# Supplementary material
Source: PubMed Central journal article supplement (PMC8326878)
Supplement: NIHMS1713528-supplement-Supporting_information.pdf [file NIHMS1713528-supplement-Supporting_information.pdf]

**SUPPORTING INFORMATION**

**Interlaboratory Comparison of Untargeted Mass  
Spectrometry Data Uncovers Underlying Causes for  
Variability**

*Trevor N. Clark<sup>1</sup>, Joëlle Houriet<sup>2</sup>, Warren S. Vidar<sup>2</sup>, Josh J. Kellogg<sup>2,3</sup>, Daniel A. Todd<sup>2</sup>, Nadja*

*B. Cech<sup>\*2</sup>, Roger G. Linington<sup>\*1</sup>*

## CONTENTS

**Note S1.** Gradient development

**Table S1.** Selection and coding of commercial green tea products under investigation

**Table S2.** Green tea standards used as quality control checks for green tea samples from Table S1

**Table S3.** Presence of standards detected in Green tea samples

**Figure S1.** MS<sup>2</sup> butterfly plots for each standard

**Table S4a.** Detailed annotations of the standards and associated peaks for Laboratory A used for Figure 5

**Table S4b.** Detailed annotations of the standards and associated peaks for Laboratory B used for Figure 5

**Figure S2.** Occurrence of adducts/fragments in Laboratory A and Laboratory B

**Table S5a.** Reference list of charged adducts used for annotation

**Table S5b.** Reference list of neutral losses used for annotation

**Table S5c.** Reference list of neutral additions used for annotation

**Figure S3.** Blank injections for laboratories A and B

**Figure S4.** Standard mix injection traces for Laboratory A and Laboratory B after MZmine 2.0 processing and filtered for only the standards.

**Figure S6.** Comparison of limits of detection for three representative green tea constituents between Laboratory A and Laboratory B.

## Note S1.

Gradient selection was designed to identify conditions that balanced separation of the standard compounds (Supplementary Table S2) against overall acquisition time. Three gradients were chosen for testing:

- 1) A gradient of (A) H<sub>2</sub>O + 0.1% FA to (B) ACN + 0.1% FA at a flow rate of 500  $\mu$ L/min and 45°C for 7.6 min (5% ACN, 0-0.3 min; 5-90% ACN, 0.3-4.7 min; 90-98% ACN, 4.7-5.5 min; 98% ACN, 5.5-5.8 min; 5% ACN, 5.81-7.6 min).
- 2) A gradient of (A) H<sub>2</sub>O + 0.1% FA to (B) ACN + 0.1% FA at a flow rate of 500  $\mu$ L/min and 45°C for 12.8 min (5% ACN, 0-0.3 min; 5-90% ACN, 0.3-9.1 min; 90-98% ACN, 9.1-10.7 min; 98% ACN, 10.7-11 min; 5% ACN, 11.01-12.8 min).
- 3) A gradient of (A) H<sub>2</sub>O + 0.1% FA to (B) ACN + 0.1% FA at a flow rate of 500  $\mu$ L/min and 45°C for 17.8 min (5% ACN, 0-0.3 min; 5-90% ACN, 0.3-14 min; 90-98% ACN, 14-15.6 min; 98% ACN, 15.6-15.9 min; 5% ACN, 15.91-17.8 min).

Gradient 2 was the shortest gradient that achieved separation of the standards; gradient 2 was therefore selected for this study.

**Table S1.** Selection and coding of commercial green tea products under investigation

| <b>code</b> | <b>product form</b> | <b>selection criteria</b>   |
|-------------|---------------------|-----------------------------|
| GT 1        | leaf tea            | consumer sales <sup>1</sup> |
| GT 2        | leaf tea            | quality report <sup>2</sup> |
| GT 3        | leaf tea            | consumer sales <sup>1</sup> |
| GT 4        | leaf tea            | quality report <sup>2</sup> |
| GT 5        | leaf tea            | quality report <sup>2</sup> |
| GT 6        | leaf tea            | quality report <sup>2</sup> |
| GT 7        | leaf tea            | quality report <sup>2</sup> |
| GT 8        | leaf tea            | quality report <sup>2</sup> |
| GT 9        | leaf tea            | quality report <sup>2</sup> |
| GT 10       | leaf tea            | quality report <sup>2</sup> |
| GT 11       | powdered tea        | consumer sales <sup>1</sup> |
| GT 12       | powdered tea        | quality report <sup>2</sup> |
| GT 13       | leaf tea            | quality report <sup>2</sup> |
| GT 14       | leaf tea            | quality report <sup>2</sup> |
| GT 15       | tea supplement      | quality report <sup>2</sup> |
| GT 16       | leaf tea            | quality report <sup>2</sup> |
| GT 17       | leaf tea            | quality report <sup>2</sup> |
| GT 18       | leaf tea            | quality report <sup>2</sup> |
| GT 19       | tea supplement      | quality report <sup>2</sup> |
| GT 20       | leaf tea            | quality report <sup>2</sup> |
| GT 21       | leaf tea            | quality report <sup>2</sup> |
| GT 22       | powdered tea        | quality report <sup>2</sup> |
| GT 23       | leaf tea            | non-green tea               |
| GT 24       | leaf tea            | consumer sales <sup>1</sup> |
| GT 25       | tea supplement      | extract report <sup>3</sup> |
| GT 26       | leaf tea            | NIST standard               |
| GT 27       | tea supplement      | NIST standard               |
| GT 28       | tea supplement      | extract report <sup>3</sup> |
| GT 29       | tea supplement      | extract report <sup>3</sup> |
| GT 30       | powdered tea        | consumer sales <sup>1</sup> |
| GT 31       | powdered tea        | consumer sales <sup>1</sup> |
| GT 32       | powdered tea        | consumer sales <sup>1</sup> |
| GT 33       | leaf tea            | quality report <sup>2</sup> |
| GT 34       | leaf tea            | quality report <sup>2</sup> |
| GT 35       | tea supplement      | extract report <sup>3</sup> |
| GT 36       | tea supplement      | extract report <sup>3</sup> |
| GT 37       | tea supplement      | NIST standard               |
| GT 38       | leaf tea            | consumer sales <sup>1</sup> |

**Table S2.** Green tea reference compounds used as quality control checks for green tea samples from Table S1

|    | reference compounds       | formula                                                      | [M+H] <sup>+</sup> | RT* in lab<br>A | RT in lab<br>B |
|----|---------------------------|--------------------------------------------------------------|--------------------|-----------------|----------------|
| 1  | caffeic acid              | C <sub>9</sub> H <sub>8</sub> O <sub>4</sub>                 | 181.0501           | 2.30            | 2.48           |
| 2  | caffeine                  | C <sub>8</sub> H <sub>10</sub> N <sub>4</sub> O <sub>2</sub> | 195.0883           | 2.18            | 2.32           |
| 3  | chlorogenic acid          | C <sub>16</sub> H <sub>18</sub> O <sub>9</sub>               | 355.1029           | 1.99            | 2.17           |
| 4  | coumaric acid             | C <sub>9</sub> H <sub>8</sub> O <sub>3</sub>                 | 165.0552           | 2.80            | 2.96           |
| 5  | (-)-epicatechin           | C <sub>15</sub> H <sub>14</sub> O <sub>6</sub>               | 291.0869           | 2.37            | 2.52           |
| 6  | (-)-epicatechin gallate   | C <sub>22</sub> H <sub>18</sub> O <sub>10</sub>              | 443.0978           | 2.90            | 3.03           |
| 7  | (-)-epigallocatechin      | C <sub>15</sub> H <sub>14</sub> O <sub>7</sub>               | 307.0818           | 1.90            | 2.05           |
| 8  | gallic acid               | C <sub>7</sub> H <sub>6</sub> O <sub>5</sub>                 | 171.0294           | 1.10            | 1.27           |
| 9  | (-)-gallocatechin         | C <sub>15</sub> H <sub>14</sub> O <sub>7</sub>               | 307.0818           | 1.54            | 1.70           |
| 10 | (-)-gallocatechin gallate | C <sub>22</sub> H <sub>18</sub> O <sub>11</sub>              | 459.0927           | 2.51            | 2.62           |
| 11 | kaempferol                | C <sub>15</sub> H <sub>10</sub> O <sub>6</sub>               | 287.0556           | 4.58            | 4.73           |
| 12 | myricetin                 | C <sub>15</sub> H <sub>10</sub> O <sub>8</sub>               | 319.0454           | 3.45            | 3.59           |
| 13 | quercetin                 | C <sub>15</sub> H <sub>10</sub> O <sub>7</sub>               | 303.0505           | 4.03            | 4.20           |
| 14 | rutin                     | C <sub>27</sub> H <sub>30</sub> O <sub>16</sub>              | 611.1612           | 2.80            | 2.94           |
| 15 | theanine                  | C <sub>7</sub> H <sub>14</sub> N <sub>2</sub> O <sub>3</sub> | 175.1083           | 0.52            | 0.59           |

\*RT = retention time (min)



|          |   |   |   |   |   |   |   |   |   |   |   |   |   |   |   |   |   |
|----------|---|---|---|---|---|---|---|---|---|---|---|---|---|---|---|---|---|
| GT 25 R2 | + | - | - | - | + | + | + | + | + | + | + | + | + | + | + | + | + |
| GT 25 R3 | + | - | - | - | + | + | + | + | + | + | + | + | + | + | + | + | + |
| GT 26 R1 | + | - | - | - | + | - | + | + | + | + | + | + | + | + | + | - | + |
| GT 26 R2 | + | + | - | - | + | + | + | + | + | - | + | + | + | + | + | - | + |
| GT 26 R3 | + | + | - | - | + | + | + | + | + | + | + | + | + | + | + | - | + |
| GT 27 R1 | + | + | - | - | + | + | + | + | + | + | + | - | + | + | + | - | + |
| GT 27 R2 | - | - | - | + | + | + | + | + | + | + | + | - | + | + | + | - | - |
| GT 27 R3 | + | + | - | + | + | + | + | + | + | + | + | + | + | + | + | - | + |
| GT 28 R1 | + | + | - | - | + | + | + | + | + | + | + | + | + | + | + | - | + |
| GT 28 R2 | + | - | - | - | + | + | + | + | + | + | + | + | + | + | + | - | + |
| GT 28 R3 | - | + | - | - | + | + | + | + | + | + | + | + | + | + | + | - | + |
| GT 29 R1 | - | - | + | - | + | + | + | + | + | + | + | + | + | + | + | + | - |
| GT 29 R2 | - | - | - | - | - | + | + | + | + | + | + | + | + | + | + | + | - |
| GT 29 R3 | - | - | + | - | - | + | + | + | + | + | + | + | + | + | + | + | - |
| GT 30 R1 | + | + | - | - | - | - | - | + | + | + | + | + | + | + | - | - | + |
| GT 30 R2 | + | + | - | - | - | - | - | + | + | + | + | + | + | + | - | - | + |
| GT 30 R3 | + | + | - | - | - | - | - | + | + | + | + | + | + | + | - | - | + |
| GT 31 R1 | + | + | - | - | - | - | - | + | + | + | + | + | + | + | - | - | + |
| GT 31 R2 | - | + | - | - | - | - | - | + | + | - | + | + | + | + | - | - | + |
| GT 31 R3 | + | + | - | - | + | + | + | + | + | + | + | + | + | + | - | - | + |
| GT 32 R1 | + | + | - | - | + | + | + | + | + | - | + | + | + | + | - | - | + |
| GT 32 R2 | + | - | - | - | + | + | + | + | + | + | + | + | + | + | - | - | + |
| GT 32 R3 | + | + | - | - | + | + | + | + | + | - | + | + | + | + | - | - | + |
| GT 33 R1 | + | - | - | - | - | + | + | + | + | + | + | + | + | + | - | + | + |
| GT 33 R2 | + | - | - | - | - | + | + | + | + | - | + | + | + | + | + | + | + |
| GT 33 R3 | + | - | - | - | - | + | + | + | + | + | + | + | + | + | - | + | + |
| GT 34 R1 | + | + | - | - | + | + | + | + | + | - | + | + | + | + | - | + | + |
| GT 34 R2 | + | + | - | - | + | + | + | + | + | + | + | + | + | + | + | + | + |
| GT 34 R3 | + | + | - | - | + | + | + | + | + | - | + | + | + | + | + | + | + |
| GT 35 R1 | + | + | + | - | + | + | + | + | + | + | + | + | + | + | + | - | - |
| GT 35 R2 | + | + | + | - | + | + | + | + | + | + | + | + | + | + | + | - | - |
| GT 35 R3 | + | + | + | - | + | + | + | + | + | + | + | + | + | + | + | - | - |
| GT 36 R1 | + | - | - | - | + | + | + | + | + | + | + | + | + | + | + | - | - |
| GT 36 R2 | + | - | - | - | + | + | + | + | + | + | + | + | + | + | + | - | - |
| GT 36 R3 | + | - | - | - | + | + | + | + | + | + | + | + | + | + | + | - | - |
| GT 37 R1 | + | + | - | - | - | + | + | + | + | + | + | + | + | + | + | - | + |
| GT 37 R2 | + | + | - | - | - | + | + | + | + | + | + | + | + | + | + | - | + |
| GT 37 R3 | + | + | - | - | - | + | + | + | + | + | + | + | + | + | + | - | + |
| GT 38 R1 | - | - | + | - | + | + | + | + | + | + | + | + | + | + | + | + | + |
| GT 38 R2 | - | - | + | - | + | + | + | + | + | + | + | + | + | + | + | + | + |
| GT 38 R3 | + | - | + | - | + | + | + | + | + | + | + | + | + | + | + | + | + |
| GT 1 R1  | + | + | + | - | + | + | - | + | - | - | - | + | + | + | + | + | + |
| GT 1 R2  | + | + | + | - | + | + | - | + | - | - | - | + | + | + | + | + | + |
| GT 1 R3  | + | + | + | - | + | + | - | + | - | - | - | + | + | + | + | + | + |
| GT 2 R1  | + | - | + | - | + | + | - | + | - | + | + | + | + | + | + | + | + |
| GT 2 R2  | + | - | + | - | + | + | - | + | - | + | + | + | + | + | + | + | + |
| GT 2 R3  | - | + | + | - | + | + | - | + | - | + | + | + | + | + | + | + | + |
| GT 3 R1  | + | + | + | - | + | + | - | + | - | + | + | + | + | + | - | + | + |
| GT 3 R2  | + | + | + | - | + | + | - | + | - | + | + | + | + | + | - | + | + |
| GT 3 R3  | + | + | + | - | + | + | - | + | - | + | + | + | + | + | - | + | + |
| GT 4 R1  | - | - | + | - | + | + | - | + | - | + | + | + | + | + | - | + | + |
| GT 4 R2  | - | - | + | - | + | + | - | + | - | + | + | + | + | + | - | + | + |
| GT 4 R3  | - | - | + | - | + | + | - | + | - | + | + | + | + | + | - | + | + |
| GT 5 R1  | + | - | + | - | + | + | - | + | - | + | + | + | + | + | - | + | + |
| GT 5 R2  | + | - | + | - | + | + | - | + | - | + | + | + | + | + | - | + | + |
| GT 5 R3  | + | - | + | - | + | + | - | + | - | + | + | + | + | + | - | + | + |
| GT 6 R1  | - | + | + | - | + | + | - | + | - | + | + | + | + | + | - | + | + |
| GT 6 R2  | - | + | + | - | + | + | - | + | - | + | + | + | + | + | - | + | + |
| GT 6 R3  | - | + | + | - | + | + | - | + | - | + | + | + | + | + | - | + | + |
| GT 7 R1  | + | + | + | - | + | + | + | + | - | + | + | + | + | + | - | + | + |
| GT 7 R2  | + | + | + | - | + | + | + | + | - | + | + | + | + | + | - | + | + |
| GT 7 R3  | + | + | + | - | + | + | + | + | - | + | + | + | + | + | - | + | + |
| GT 8 R1  | + | + | + | - | + | + | + | + | - | + | + | + | + | + | - | + | + |
| GT 8 R2  | + | + | + | - | + | + | + | + | - | + | + | + | + | + | - | + | + |
| GT 8 R3  | + | + | + | - | + | + | + | + | - | + | + | + | + | + | - | + | + |
| GT 9 R1  | + | + | + | - | + | + | + | + | - | + | + | + | + | + | - | + | + |
| GT 9 R2  | + | + | + | - | + | + | + | + | - | + | + | + | + | + | - | + | + |
| GT 9 R3  | + | + | + | - | + | + | + | + | - | + | + | + | + | + | - | + | + |
| GT 10 R1 | + | + | + | - | + | + | + | + | - | + | + | + | + | + | - | + | + |
| GT 10 R2 | + | + | + | - | + | + | + | + | - | + | + | + | + | + | - | + | + |
| GT 10 R3 | + | + | + | - | + | + | + | + | - | + | + | + | + | + | - | + | + |
| GT 11 R1 | + | + | + | - | + | + | + | + | - | + | + | + | + | + | - | + | + |
| GT 11 R2 | + | + | + | - | + | + | + | + | - | + | + | + | + | + | - | + | + |
| GT 11 R3 | + | + | + | - | + | + | + | + | - | + | + | + | + | + | - | + | + |
| GT 12 R1 | + | + | + | - | + | + | + | + | - | + | + | + | + | + | - | + | + |
| GT 12 R2 | + | + | + | - | + | + | + | + | - | + | + | + | + | + | - | + | + |
| GT 12 R3 | - | + | + | - | + | + | + | + | - | + | + | + | + | + | - | + | + |
| GT 13 R1 | - | + | + | - | + | + | - | + | - | + | + | + | + | + | - | + | + |
| GT 13 R2 | - | + | + | - | + | + | - | + | - | + | + | + | + | + | - | + | + |
| GT 13 R3 | - | + | + | - | + | + | - | + | - | + | + | + | + | + | - | + | + |
| GT 14 R1 | - | + | + | - | + | + | - | + | - | + | + | + | + | + | - | + | + |

Lab B





**Figure S1.** Butterfly plots for MS<sup>2</sup> spectra from reference compounds

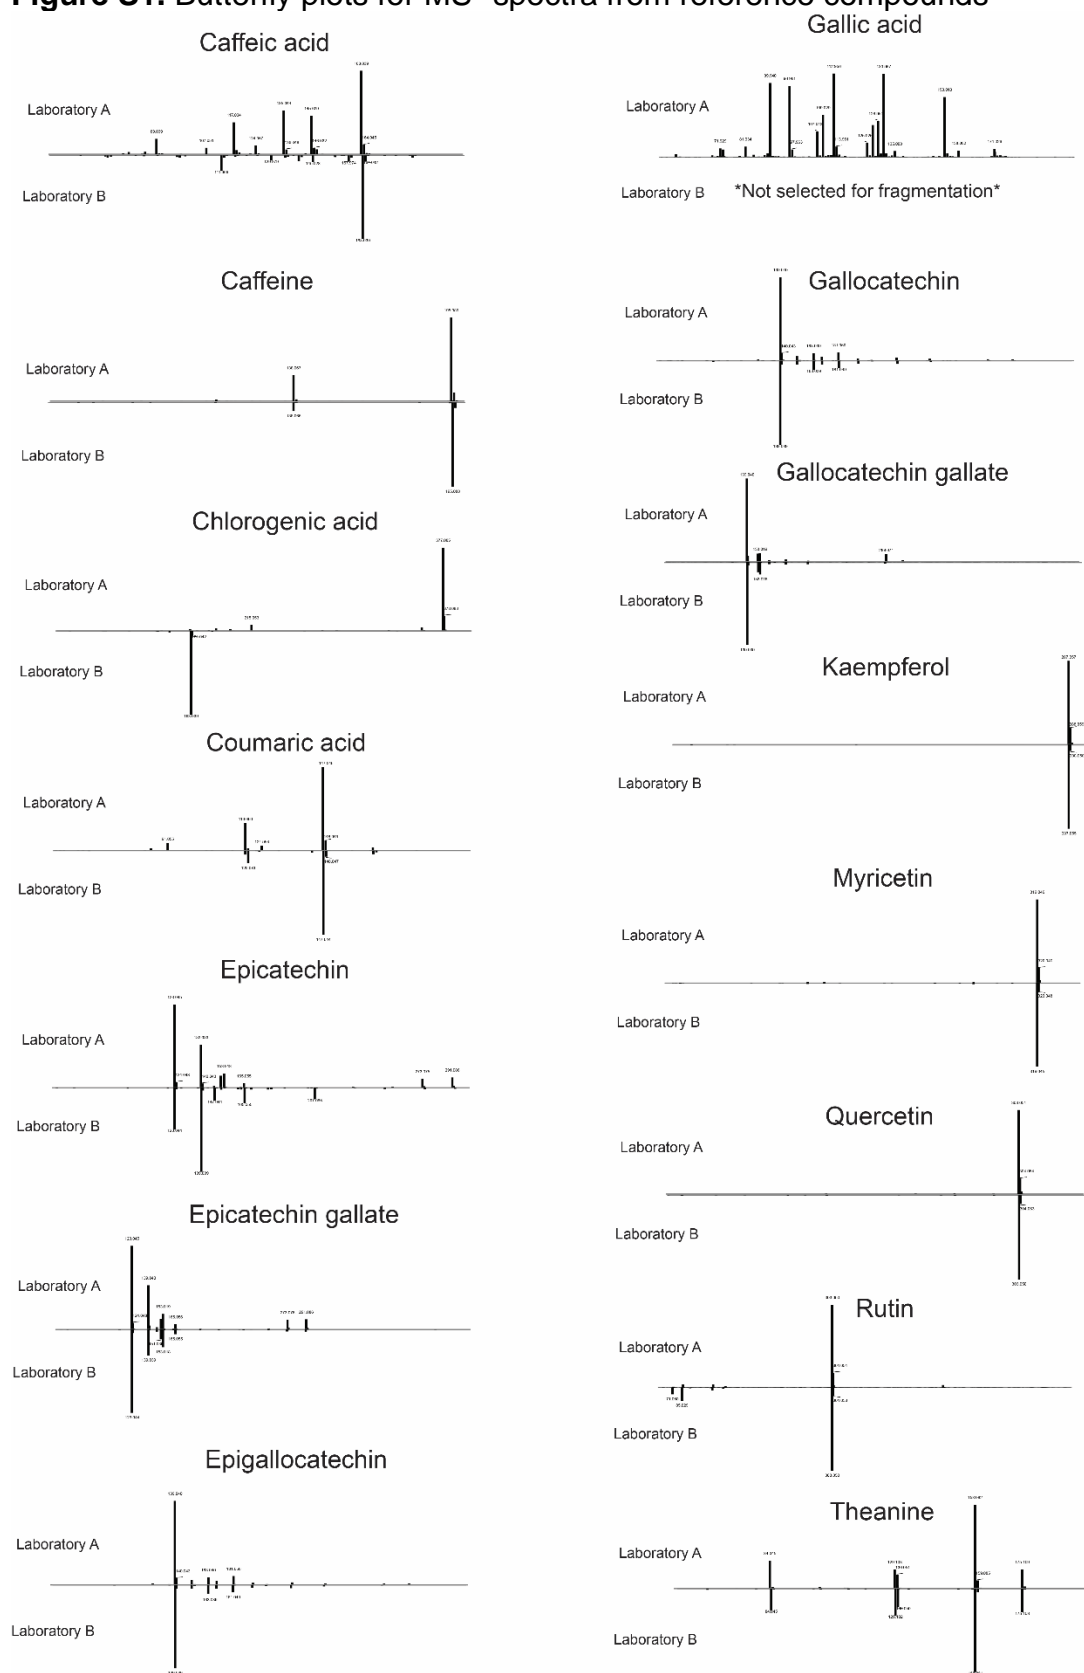

**Table S4a:** Detailed annotations of the reference compounds and associated features for Laboratory A used for Figure 5

| <i>m/z</i> | retention time (min) | annotation                                                                          |
|------------|----------------------|-------------------------------------------------------------------------------------|
| 181.0503   | 2.32                 | Caffeic acid: [M+H] <sup>+</sup>                                                    |
| 233.9608   | 2.30                 | Caffeic acid: unknown feature                                                       |
| 251.9715   | 2.30                 | Caffeic acid: unknown feature                                                       |
| 275.9945   | 2.32                 | Caffeic acid: unknown feature                                                       |
| 331.9382   | 2.32                 | Caffeic acid: unknown feature                                                       |
| 415.0102   | 2.32                 | Caffeic acid: unknown feature                                                       |
| 194.0804   | 2.16                 | Caffeine: [M] <sup>+</sup>                                                          |
| 195.0887   | 2.12                 | Caffeine: [M+H] <sup>+</sup>                                                        |
| 195.2075   | 2.16                 | Caffeine: unknown feature                                                           |
| 197.0928   | 2.16                 | Caffeine: unknown feature                                                           |
| 214.0613   | 2.16                 | Caffeine: unknown feature                                                           |
| 214.5629   | 2.16                 | Caffeine: unknown feature                                                           |
| 223.0668   | 2.16                 | Caffeine: unknown feature                                                           |
| 234.5747   | 2.16                 | Caffeine: unknown feature                                                           |
| 255.0665   | 2.16                 | Caffeine: unknown feature                                                           |
| 267.0178   | 2.16                 | Caffeine: unknown feature                                                           |
| 295.013    | 2.16                 | Caffeine: unknown feature                                                           |
| 311.1016   | 2.17                 | Caffeine: unknown feature                                                           |
| 311.6031   | 2.16                 | Caffeine: unknown feature                                                           |
| 312.0145   | 2.16                 | Caffeine: unknown feature                                                           |
| 331.0123   | 2.17                 | Caffeine: unknown feature                                                           |
| 346.9845   | 2.17                 | Caffeine: unknown feature                                                           |
| 506.0959   | 2.16                 | Caffeine: unknown feature                                                           |
| 706.0835   | 2.16                 | Caffeine: unknown feature                                                           |
| 163.0397   | 1.99                 | Chlorogenic acid: [M+H-C <sub>7</sub> H <sub>12</sub> O <sub>6</sub> ] <sup>+</sup> |
| 354.0932   | 1.98                 | Chlorogenic acid: [M] <sup>+</sup>                                                  |
| 355.1029   | 1.99                 | Chlorogenic acid: [M+H] <sup>+</sup>                                                |
| 337.0923   | 1.99                 | Chlorogenic acid: [M+H-H <sub>2</sub> O] <sup>+</sup>                               |
| 361.1105   | 1.99                 | Chlorogenic acid: [M+Li] <sup>+</sup>                                               |
| 377.0845   | 1.99                 | Chlorogenic acid: [M+Na] <sup>+</sup>                                               |
| 197.0286   | 1.99                 | Chlorogenic acid: unknown feature                                                   |
| 217.5419   | 1.99                 | Chlorogenic acid: unknown feature                                                   |
| 228.9808   | 1.99                 | Chlorogenic acid: unknown feature                                                   |
| 257.9851   | 1.99                 | Chlorogenic acid: unknown feature                                                   |
| 270.0055   | 1.99                 | Chlorogenic acid: unknown feature                                                   |
| 374.0756   | 1.99                 | Chlorogenic acid: unknown feature                                                   |
| 393.0557   | 1.99                 | Chlorogenic acid: unknown feature                                                   |
| 408.0139   | 1.99                 | Chlorogenic acid: unknown feature                                                   |
| 409.0191   | 1.82                 | Chlorogenic acid: unknown feature                                                   |
| 439.0534   | 1.99                 | Chlorogenic acid: unknown feature                                                   |
| 449.0404   | 1.99                 | Chlorogenic acid: unknown feature                                                   |

|          |      |                                                                                                                                    |
|----------|------|------------------------------------------------------------------------------------------------------------------------------------|
| 454.0193 | 1.99 | Chlorogenic acid: unknown feature                                                                                                  |
| 165.0554 | 2.79 | Coumaric acid & rutin: [M+H] <sup>+</sup>                                                                                          |
| 611.1606 | 2.79 | Coumaric acid & rutin: [M+H] <sup>+</sup>                                                                                          |
| 303.0503 | 2.77 | Coumaric acid & rutin: [M+H-(C <sub>12</sub> H <sub>22</sub> O <sub>10</sub> -H <sub>2</sub> O)] <sup>+</sup>                      |
| 285.0391 | 2.79 | Coumaric acid & rutin: [M+H-(C <sub>12</sub> H <sub>22</sub> O <sub>10</sub> -H <sub>2</sub> O)-H <sub>2</sub> O] <sup>+</sup>     |
| 325.0577 | 2.79 | Coumaric acid & rutin: [M+H-(C <sub>12</sub> H <sub>22</sub> O <sub>10</sub> -H <sub>2</sub> O)-H <sub>2</sub> O+ACN] <sup>+</sup> |
| 257.0443 | 2.79 | Coumaric acid & rutin: [M+H-(C <sub>12</sub> H <sub>22</sub> O <sub>10</sub> -H <sub>2</sub> O)-H <sub>2</sub> O-CO] <sup>+</sup>  |
| 465.1028 | 2.79 | Coumaric acid & rutin: [M+H-(C <sub>6</sub> H <sub>12</sub> O <sub>5</sub> -H <sub>2</sub> O)] <sup>+</sup>                        |
| 449.1076 | 2.79 | Coumaric acid & rutin: [M+H-(C <sub>6</sub> H <sub>12</sub> O <sub>6</sub> -H <sub>2</sub> O)] <sup>+</sup>                        |
| 617.1688 | 2.79 | Coumaric acid & rutin: [M+Li] <sup>+</sup>                                                                                         |
| 633.1419 | 2.79 | Coumaric acid & rutin: [M+Na] <sup>+</sup>                                                                                         |
| 325.5595 | 2.79 | Coumaric acid & rutin: unknown feature                                                                                             |
| 382.0142 | 2.79 | Coumaric acid & rutin: unknown feature                                                                                             |
| 397.9959 | 2.79 | Coumaric acid & rutin: unknown feature                                                                                             |
| 407.0808 | 2.79 | Coumaric acid & rutin: unknown feature                                                                                             |
| 518.0143 | 2.79 | Coumaric acid & rutin: unknown feature                                                                                             |
| 546.6025 | 2.79 | Coumaric acid & rutin: unknown feature                                                                                             |
| 631.1339 | 2.79 | Coumaric acid & rutin: unknown feature                                                                                             |
| 635.1448 | 2.79 | Coumaric acid & rutin: unknown feature                                                                                             |
| 665.0782 | 2.79 | Coumaric acid & rutin: unknown feature                                                                                             |
| 291.0865 | 2.37 | Epicatechin: [M+H] <sup>+</sup>                                                                                                    |
| 165.0554 | 2.37 | Epicatechin: [M+H-C <sub>6</sub> H <sub>6</sub> O <sub>3</sub> ] <sup>+</sup>                                                      |
| 313.0683 | 2.37 | Epicatechin: [M+Na] <sup>+</sup>                                                                                                   |
| 169.0504 | 2.37 | Epicatechin: unknown feature                                                                                                       |
| 174.0266 | 2.37 | Epicatechin: unknown feature                                                                                                       |
| 248.0007 | 2.37 | Epicatechin: unknown feature                                                                                                       |
| 249.0763 | 2.37 | Epicatechin: unknown feature                                                                                                       |
| 343.9981 | 2.37 | Epicatechin: unknown feature                                                                                                       |
| 345.005  | 2.37 | Epicatechin: unknown feature                                                                                                       |
| 385.0248 | 2.37 | Epicatechin: unknown feature                                                                                                       |
| 393.2086 | 2.34 | Epicatechin: unknown feature                                                                                                       |
| 399.0382 | 2.32 | Epicatechin: unknown feature                                                                                                       |
| 443.0978 | 2.91 | Epicatechin gallate: [M+H] <sup>+</sup>                                                                                            |
| 291.0867 | 2.90 | Epicatechin gallate: [M+H-(C <sub>7</sub> H <sub>6</sub> O <sub>5</sub> -H <sub>2</sub> O)] <sup>+</sup>                           |
| 273.0758 | 2.91 | Epicatechin gallate : [M+H-(C <sub>7</sub> H <sub>6</sub> O <sub>5</sub> -H <sub>2</sub> O)-H <sub>2</sub> O] <sup>+</sup>         |
| 250.0024 | 2.90 | Epicatechin gallate: unknown feature                                                                                               |
| 272.0678 | 2.90 | Epicatechin gallate: unknown feature                                                                                               |
| 345.0056 | 2.91 | Epicatechin gallate: unknown feature                                                                                               |
| 496.0085 | 2.89 | Epicatechin gallate: unknown feature                                                                                               |
| 537.0357 | 2.89 | Epicatechin gallate: unknown feature                                                                                               |
| 579.0211 | 2.90 | Epicatechin gallate: unknown feature                                                                                               |
| 938.0975 | 2.91 | Epicatechin gallate: unknown feature                                                                                               |
| 307.0816 | 1.92 | Epigallocatechin: [M+H] <sup>+</sup>                                                                                               |
| 181.0502 | 1.92 | Epigallocatechin: [M+H-C <sub>6</sub> H <sub>6</sub> O <sub>3</sub> ] <sup>+</sup>                                                 |

---

|          |      |                                                                                                            |
|----------|------|------------------------------------------------------------------------------------------------------------|
| 173.0186 | 1.92 | Epigallocatechin: unknown feature                                                                          |
| 206.9966 | 1.92 | Epigallocatechin: unknown feature                                                                          |
| 349.0499 | 1.92 | Epigallocatechin: unknown feature                                                                          |
| 401.0193 | 1.92 | Epigallocatechin: unknown feature                                                                          |
| 171.0294 | 1.09 | Gallic acid: [M+H] <sup>+</sup>                                                                            |
| 250.0027 | 1.09 | Gallic acid: unknown feature                                                                               |
| 262.9723 | 1.08 | Gallic acid: unknown feature                                                                               |
| 264.9673 | 1.09 | Gallic acid: unknown feature                                                                               |
| 265.973  | 1.09 | Gallic acid: unknown feature                                                                               |
| 266.9751 | 1.09 | Gallic acid: unknown feature                                                                               |
| 301.9548 | 1.09 | Gallic acid: unknown feature                                                                               |
| 321.9175 | 1.09 | Gallic acid: unknown feature                                                                               |
| 322.9235 | 1.09 | Gallic acid: unknown feature                                                                               |
| 394.9682 | 1.09 | Gallic acid: unknown feature                                                                               |
| 307.0815 | 1.55 | Gallocatechin: [M+H] <sup>+</sup>                                                                          |
| 289.0705 | 1.55 | Gallocatechin: [M+H-H <sub>2</sub> O] <sup>+</sup>                                                         |
| 169.0505 | 1.54 | Gallocatechin: unknown feature                                                                             |
| 173.5201 | 1.55 | Gallocatechin: unknown feature                                                                             |
| 349.05   | 1.55 | Gallocatechin: unknown feature                                                                             |
| 359.9924 | 1.55 | Gallocatechin: unknown feature                                                                             |
| 399.0215 | 1.55 | Gallocatechin: unknown feature                                                                             |
| 401.0192 | 1.55 | Gallocatechin: unknown feature                                                                             |
| 457.9694 | 1.55 | Gallocatechin: unknown feature                                                                             |
| 666.066  | 1.54 | Gallocatechin: unknown feature                                                                             |
| 459.0924 | 2.50 | Gallocatechin gallate: [M+H] <sup>+</sup>                                                                  |
| 289.035  | 2.48 | Gallocatechin gallate: [M+H-C <sub>8</sub> H <sub>8</sub> O <sub>4</sub> -2H <sup>app</sup> ] <sup>+</sup> |
| 481.074  | 2.52 | Gallocatechin gallate: [M+Na] <sup>+</sup>                                                                 |
| 361.0004 | 2.51 | Gallocatechin gallate: unknown feature                                                                     |
| 512.0035 | 2.50 | Gallocatechin gallate: unknown feature                                                                     |
| 553.0305 | 2.52 | Gallocatechin gallate: unknown feature                                                                     |
| 286.0468 | 4.55 | Kaempferol: [M] <sup>+</sup>                                                                               |
| 259.0588 | 4.56 | Kaempferol: [M.-CO] <sup>+</sup>                                                                           |
| 287.0554 | 4.55 | Kaempferol: [M+H] <sup>+</sup>                                                                             |
| 241.0499 | 4.56 | Kaempferol: [M+H-HCOOH] <sup>+</sup>                                                                       |
| 163.0049 | 4.58 | Kaempferol: unknown feature                                                                                |
| 183.5184 | 4.55 | Kaempferol: unknown feature                                                                                |
| 229.0503 | 4.55 | Kaempferol: unknown feature                                                                                |
| 287.1998 | 4.55 | Kaempferol: unknown feature                                                                                |
| 325.0021 | 4.56 | Kaempferol: unknown feature                                                                                |
| 366.0286 | 4.56 | Kaempferol: unknown feature                                                                                |
| 371.0074 | 4.57 | Kaempferol: unknown feature                                                                                |
| 380.0038 | 4.58 | Kaempferol: unknown feature                                                                                |
| 382.001  | 4.55 | Kaempferol: unknown feature                                                                                |
| 384.0016 | 4.55 | Kaempferol: unknown feature                                                                                |

---

---

|          |      |                                                   |
|----------|------|---------------------------------------------------|
| 387.9951 | 4.57 | Kaempferol: unknown feature                       |
| 422.9774 | 4.57 | Kaempferol: unknown feature                       |
| 438.9512 | 4.55 | Kaempferol: unknown feature                       |
| 611.0495 | 4.55 | Kaempferol: unknown feature                       |
| 626.014  | 4.55 | Kaempferol: unknown feature                       |
| 709.0239 | 4.55 | Kaempferol: unknown feature                       |
| 319.0454 | 3.45 | Myricetin: [M+H] <sup>+</sup>                     |
| 178.9998 | 3.45 | Myricetin: unknown feature                        |
| 188.0057 | 3.45 | Myricetin: unknown feature                        |
| 199.5135 | 3.45 | Myricetin: unknown feature                        |
| 207.4997 | 3.45 | Myricetin: unknown feature                        |
| 322.0529 | 3.45 | Myricetin: unknown feature                        |
| 356.9911 | 3.45 | Myricetin: unknown feature                        |
| 389.9675 | 3.45 | Myricetin: unknown feature                        |
| 398.0178 | 3.45 | Myricetin: unknown feature                        |
| 413.9907 | 3.45 | Myricetin: unknown feature                        |
| 689.9933 | 3.45 | Myricetin: unknown feature                        |
| 303.0508 | 4.02 | Quercetin: [M+H] <sup>+</sup>                     |
| 229.0502 | 4.02 | Quercetin: [M+H-CO-CO <sub>2</sub> ] <sup>+</sup> |
| 285.0397 | 4.02 | Quercetin: [M+H-H <sub>2</sub> O] <sup>+</sup>    |
| 257.0446 | 4.02 | Quercetin: [M+H-H <sub>2</sub> O-CO] <sup>+</sup> |
| 180.008  | 4.01 | Quercetin: unknown feature                        |
| 198.9982 | 4.02 | Quercetin: unknown feature                        |
| 200.0037 | 4.02 | Quercetin: unknown feature                        |
| 201.0552 | 4.02 | Quercetin: unknown feature                        |
| 303.1993 | 4.02 | Quercetin: unknown feature                        |
| 303.2879 | 4.02 | Quercetin: unknown feature                        |
| 305.0558 | 4.02 | Quercetin: unknown feature                        |
| 340.997  | 4.02 | Quercetin: unknown feature                        |
| 382.0232 | 4.02 | Quercetin: unknown feature                        |
| 397.9958 | 4.02 | Quercetin: unknown feature                        |
| 399.9975 | 4.02 | Quercetin: unknown feature                        |
| 454.9467 | 4.02 | Quercetin: unknown feature                        |
| 629.0511 | 4.02 | Quercetin: unknown feature                        |
| 643.0385 | 4.03 | Quercetin: unknown feature                        |
| 658.0037 | 4.02 | Quercetin: unknown feature                        |
| 755.9795 | 4.02 | Quercetin: unknown feature                        |
| 175.1086 | 0.49 | Theanine: [M+H] <sup>+</sup>                      |
| 160.0867 | 0.49 | Theanine: [M+H-CH <sub>3</sub> ] <sup>+</sup>     |
| 306.0977 | 0.49 | Theanine: unknown feature                         |

---

**Table S4b:** Detailed annotations of the reference compounds and associated features for Laboratory B used for Figure 5

| <i>m/z</i> | retention time (min) | annotation                                                                          |
|------------|----------------------|-------------------------------------------------------------------------------------|
| 181.0498   | 2.47                 | Caffeic acid: [M+H] <sup>+</sup>                                                    |
| 222.9983   | 2.47                 | Caffeic acid: [M+H+2Na-2H] <sup>+</sup>                                             |
| 225.014    | 2.47                 | Caffeic acid: [M+Na+Na-H] <sup>+</sup>                                              |
| 293.0001   | 2.47                 | Caffeic acid: [M+Na+Na-H+NaCOOH] <sup>+</sup>                                       |
| 301.0484   | 2.47                 | Caffeic acid: unknown feature                                                       |
| 304.995    | 2.47                 | Caffeic acid: unknown feature                                                       |
| 306.0283   | 2.48                 | Caffeic acid: unknown feature                                                       |
| 311.0079   | 2.47                 | Caffeic acid: unknown feature                                                       |
| 316.014    | 2.48                 | Caffeic acid: unknown feature                                                       |
| 317.0211   | 2.47                 | Caffeic acid: unknown feature                                                       |
| 319.0215   | 2.48                 | Caffeic acid: unknown feature                                                       |
| 319.0593   | 2.47                 | Caffeic acid: unknown feature                                                       |
| 321.0165   | 2.48                 | Caffeic acid: unknown feature                                                       |
| 328.0098   | 2.47                 | Caffeic acid: unknown feature                                                       |
| 334.0236   | 2.47                 | Caffeic acid: unknown feature                                                       |
| 342.0746   | 2.47                 | Caffeic acid: unknown feature                                                       |
| 343.9815   | 2.47                 | Caffeic acid: unknown feature                                                       |
| 345.9837   | 2.48                 | Caffeic acid: unknown feature                                                       |
| 347.0542   | 2.47                 | Caffeic acid: unknown feature                                                       |
| 354.971    | 2.47                 | Caffeic acid: unknown feature                                                       |
| 370.9441   | 2.47                 | Caffeic acid: unknown feature                                                       |
| 387.9475   | 2.47                 | Caffeic acid: unknown feature                                                       |
| 422.9562   | 2.47                 | Caffeic acid: unknown feature                                                       |
| 428.976    | 2.47                 | Caffeic acid: unknown feature                                                       |
| 194.0793   | 2.33                 | Caffeine: [M] <sup>+</sup>                                                          |
| 195.0871   | 2.33                 | Caffeine: [M+H] <sup>+</sup>                                                        |
| 355.1012   | 2.17                 | Chlorogenic acid: [M+H] <sup>+</sup>                                                |
| 372.1292   | 2.17                 | Chlorogenic acid: [M+H+NH <sub>3</sub> ] <sup>+</sup>                               |
| 353.0854   | 2.17                 | Chlorogenic acid: [M+H-2H <sup>app</sup> ] <sup>+</sup>                             |
| 370.1121   | 2.17                 | Chlorogenic acid: [M+H-2H <sup>app</sup> +NH <sub>3</sub> ] <sup>+</sup>            |
| 163.0386   | 2.17                 | Chlorogenic acid: [M+H-C <sub>7</sub> H <sub>12</sub> O <sub>6</sub> ] <sup>+</sup> |
| 377.0832   | 2.17                 | Chlorogenic acid: [M+Na] <sup>+</sup>                                               |
| 399.0653   | 2.17                 | Chlorogenic acid: [M+Na+Na-H] <sup>+</sup>                                          |
| 467.0544   | 2.17                 | Chlorogenic acid: [M+Na+Na-H+NaCOOH] <sup>+</sup>                                   |
| 375.067    | 2.17                 | Chlorogenic acid: [M+Na-2H <sup>app</sup> ] <sup>+</sup>                            |
| 465.0363   | 2.17                 | Chlorogenic acid: [M+Na-2H <sup>app</sup> +Na-H+NaCOOH] <sup>+</sup>                |
| 378.0885   | 2.17                 | Chlorogenic acid: unknown feature                                                   |
| 439.0548   | 2.17                 | Chlorogenic acid: unknown feature                                                   |
| 454.0183   | 2.17                 | Chlorogenic acid: unknown feature                                                   |
| 459.0226   | 2.18                 | Chlorogenic acid: unknown feature                                                   |
| 472.0281   | 2.17                 | Chlorogenic acid: unknown feature                                                   |

---

|          |      |                                                                                                        |
|----------|------|--------------------------------------------------------------------------------------------------------|
| 478.0669 | 2.18 | Chlorogenic acid: unknown feature                                                                      |
| 480.0804 | 2.17 | Chlorogenic acid: unknown feature                                                                      |
| 490.0646 | 2.16 | Chlorogenic acid: unknown feature                                                                      |
| 493.0304 | 2.17 | Chlorogenic acid: unknown feature                                                                      |
| 529.0245 | 2.17 | Chlorogenic acid: unknown feature                                                                      |
| 533.0224 | 2.16 | Chlorogenic acid: unknown feature                                                                      |
| 165.0543 | 2.96 | Coumaric acid : [M+H] <sup>+</sup>                                                                     |
| 209.018  | 2.97 | Coumaric acid : [M+Na+Na-H] <sup>+</sup>                                                               |
| 277.0038 | 2.96 | Coumaric acid : [M+Na+Na-H+NaCOOH] <sup>+</sup>                                                        |
| 318.0294 | 2.96 | Coumaric acid : [M+Na+Na-H+NaCOOH+ACN] <sup>+</sup>                                                    |
| 244.0268 | 2.96 | Coumaric acid : unknown feature                                                                        |
| 250.045  | 2.97 | Coumaric acid : unknown feature                                                                        |
| 270.9889 | 2.97 | Coumaric acid : unknown feature                                                                        |
| 285.0538 | 2.97 | Coumaric acid : unknown feature                                                                        |
| 288.999  | 2.97 | Coumaric acid : unknown feature                                                                        |
| 290.0336 | 2.97 | Coumaric acid : unknown feature                                                                        |
| 295.0131 | 2.96 | Coumaric acid : unknown feature                                                                        |
| 301.0256 | 2.97 | Coumaric acid : unknown feature                                                                        |
| 303.0272 | 2.97 | Coumaric acid : unknown feature                                                                        |
| 303.0647 | 2.96 | Coumaric acid : unknown feature                                                                        |
| 304.9976 | 2.97 | Coumaric acid : unknown feature                                                                        |
| 305.0228 | 2.96 | Coumaric acid : unknown feature                                                                        |
| 308.0434 | 2.96 | Coumaric acid : unknown feature                                                                        |
| 312.0141 | 2.97 | Coumaric acid : unknown feature                                                                        |
| 326.0803 | 2.96 | Coumaric acid : unknown feature                                                                        |
| 327.9871 | 2.96 | Coumaric acid : unknown feature                                                                        |
| 329.9874 | 2.97 | Coumaric acid : unknown feature                                                                        |
| 331.0589 | 2.97 | Coumaric acid : unknown feature                                                                        |
| 338.9758 | 2.96 | Coumaric acid : unknown feature                                                                        |
| 343.9573 | 2.97 | Coumaric acid : unknown feature                                                                        |
| 344.9938 | 2.97 | Coumaric acid : unknown feature                                                                        |
| 354.9486 | 2.96 | Coumaric acid : unknown feature                                                                        |
| 406.9635 | 2.96 | Coumaric acid : unknown feature                                                                        |
| 422.9358 | 2.96 | Coumaric acid : unknown feature                                                                        |
| 423.0386 | 2.97 | Coumaric acid : unknown feature                                                                        |
| 443.0959 | 3.04 | Epicatechin gallate: [M+H] <sup>+</sup>                                                                |
| 578.0646 | 3.04 | Epicatechin gallate: [M+H+2xNaCOOH] <sup>+</sup>                                                       |
| 273.0761 | 3.04 | Epicatechin gallate: [M+H-C <sub>7</sub> H <sub>5</sub> O <sub>5</sub> -H <sub>2</sub> O] <sup>+</sup> |
| 487.0582 | 3.03 | Epicatechin gallate: [M+Na+Na-H] <sup>+</sup>                                                          |
| 458.11   | 3.04 | Epicatechin gallate: unknown feature                                                                   |
| 474.1017 | 3.05 | Epicatechin gallate: unknown feature                                                                   |
| 492.1131 | 3.05 | Epicatechin gallate: unknown feature                                                                   |
| 527.0505 | 3.04 | Epicatechin gallate: unknown feature                                                                   |
| 533.0689 | 3.04 | Epicatechin gallate: unknown feature                                                                   |

---

---

|          |      |                                                                     |
|----------|------|---------------------------------------------------------------------|
| 534.0683 | 3.05 | Epicatechin gallate: unknown feature                                |
| 537.0358 | 3.04 | Epicatechin gallate: unknown feature                                |
| 545.0618 | 3.04 | Epicatechin gallate: unknown feature                                |
| 549.0291 | 3.04 | Epicatechin gallate: unknown feature                                |
| 555.0506 | 3.04 | Epicatechin gallate: unknown feature                                |
| 556.0503 | 3.05 | Epicatechin gallate: unknown feature                                |
| 568.0738 | 3.04 | Epicatechin gallate: unknown feature                                |
| 590.0579 | 3.04 | Epicatechin gallate: unknown feature                                |
| 595.0367 | 3.03 | Epicatechin gallate: unknown feature                                |
| 605.0262 | 3.04 | Epicatechin gallate: unknown feature                                |
| 617.0186 | 3.04 | Epicatechin gallate: unknown feature                                |
| 623.0365 | 3.05 | Epicatechin gallate: unknown feature                                |
| 638.9989 | 3.04 | Epicatechin gallate: unknown feature                                |
| 291.0858 | 2.53 | Epicatechin: [M+H] <sup>+</sup>                                     |
| 289.071  | 2.53 | Epicatechin: [M+H-2H <sup>app</sup> ] <sup>+</sup>                  |
| 306.0968 | 2.53 | Epicatechin: [M+H-2H <sup>app</sup> +NH <sub>3</sub> ] <sup>+</sup> |
| 381.055  | 2.52 | Epicatechin: [M+Na+NaCOOH] <sup>+</sup>                             |
| 403.0371 | 2.52 | Epicatechin: [M+Na+Na-H+NaCOOH] <sup>+</sup>                        |
| 311.052  | 2.53 | Epicatechin: [M+Na-2H <sup>app</sup> ] <sup>+</sup>                 |
| 352.0777 | 2.53 | Epicatechin: [M+Na-2H <sup>app</sup> +ACN] <sup>+</sup>             |
| 293.0907 | 2.53 | Epicatechin: unknown feature                                        |
| 375.0393 | 2.53 | Epicatechin: unknown feature                                        |
| 393.0479 | 2.53 | Epicatechin: unknown feature                                        |
| 416.0632 | 2.53 | Epicatechin: unknown feature                                        |
| 426.0502 | 2.52 | Epicatechin: unknown feature                                        |
| 443.0251 | 2.53 | Epicatechin: unknown feature                                        |
| 453.0109 | 2.53 | Epicatechin: unknown feature                                        |
| 454.0184 | 2.53 | Epicatechin: unknown feature                                        |
| 479.9709 | 2.52 | Epicatechin: unknown feature                                        |
| 480.9795 | 2.52 | Epicatechin: unknown feature                                        |
| 307.0819 | 2.05 | Epigallocatechin: [M+H] <sup>+</sup>                                |
| 321.0603 | 2.05 | Epigallocatechin: unknown feature                                   |
| 391.0342 | 2.05 | Epigallocatechin: unknown feature                                   |
| 409.0427 | 2.06 | Epigallocatechin: unknown feature                                   |
| 432.0596 | 2.05 | Epigallocatechin: unknown feature                                   |
| 442.0452 | 2.05 | Epigallocatechin: unknown feature                                   |
| 469.0086 | 2.05 | Epigallocatechin: unknown feature                                   |
| 495.966  | 2.05 | Epigallocatechin: unknown feature                                   |
| 329.063  | 2.05 | Epigallocatechin: [M+Na] <sup>+</sup>                               |
| 397.0505 | 2.06 | Epigallocatechin: [M+Na+NaCOOH] <sup>+</sup>                        |
| 419.0327 | 2.05 | Epigallocatechin: [M+Na+Na-H+NaCOOH] <sup>+</sup>                   |
| 214.9924 | 1.26 | Gallic acid: [M+Na+Na-H] <sup>+</sup>                               |
| 459.0929 | 2.64 | Gallocatechin gallate: [M+H] <sup>+</sup>                           |
| 481.0746 | 2.64 | Gallocatechin gallate: [M+Na] <sup>+</sup>                          |

---



|          |      |                                                        |
|----------|------|--------------------------------------------------------|
| 549.0601 | 2.63 | Gallocatechin gallate: [M+Na+NaCOOH] <sup>+</sup>      |
| 503.0544 | 2.64 | Gallocatechin gallate: [M+Na+Na-H] <sup>+</sup>        |
| 571.0452 | 2.64 | Gallocatechin gallate: [M+Na+Na-H+NaCOOH] <sup>+</sup> |
| 303.0496 | 2.64 | Gallocatechin gallate: unknown feature                 |
| 461.0957 | 2.64 | Gallocatechin gallate: unknown feature                 |
| 492.1132 | 2.64 | Gallocatechin gallate: unknown feature                 |
| 508.1104 | 2.64 | Gallocatechin gallate: unknown feature                 |
| 553.0286 | 2.63 | Gallocatechin gallate: unknown feature                 |
| 584.0691 | 2.64 | Gallocatechin gallate: unknown feature                 |
| 594.0544 | 2.64 | Gallocatechin gallate: unknown feature                 |
| 595.0644 | 2.63 | Gallocatechin gallate: unknown feature                 |
| 606.0549 | 2.63 | Gallocatechin gallate: unknown feature                 |
| 307.0819 | 1.70 | Gallocatechin: [M+Na+Na-H+NaCOOH] <sup>+</sup>         |
| 286.0469 | 4.74 | Kaempferol: [M] <sup>+</sup>                           |
| 287.0543 | 4.73 | Kaempferol: [M+H] <sup>+</sup>                         |
| 399.0044 | 4.74 | Kaempferol: [M+Na+Na-H+NaCOOH] <sup>+</sup>            |
| 407.0533 | 4.74 | Kaempferol: unknown feature                            |
| 224.5442 | 4.74 | Kaempferol: unknown feature                            |
| 289.0595 | 4.73 | Kaempferol: unknown feature                            |
| 366.0267 | 4.74 | Kaempferol: unknown feature                            |
| 384.039  | 4.74 | Kaempferol: unknown feature                            |
| 392.9885 | 4.74 | Kaempferol: unknown feature                            |
| 408.0596 | 4.74 | Kaempferol: unknown feature                            |
| 408.9602 | 4.74 | Kaempferol: unknown feature                            |
| 410.999  | 4.74 | Kaempferol: unknown feature                            |
| 412.0323 | 4.74 | Kaempferol: unknown feature                            |
| 423.0266 | 4.74 | Kaempferol: unknown feature                            |
| 425.0263 | 4.74 | Kaempferol: unknown feature                            |
| 425.0637 | 4.74 | Kaempferol: unknown feature                            |
| 425.9624 | 4.74 | Kaempferol: unknown feature                            |
| 426.9985 | 4.74 | Kaempferol: unknown feature                            |
| 427.0236 | 4.74 | Kaempferol: unknown feature                            |
| 434.0165 | 4.74 | Kaempferol: unknown feature                            |
| 435.0173 | 4.74 | Kaempferol: unknown feature                            |
| 448.082  | 4.74 | Kaempferol: unknown feature                            |
| 451.9886 | 4.73 | Kaempferol: unknown feature                            |
| 453.0612 | 4.75 | Kaempferol: unknown feature                            |
| 460.9783 | 4.73 | Kaempferol: unknown feature                            |
| 319.0459 | 3.60 | Myricetin: [M+H] <sup>+</sup>                          |
| 360.9927 | 3.60 | Myricetin: [M+H+2Na-2H] <sup>+</sup>                   |
| 317.0289 | 3.60 | Myricetin: [M+H-2H <sup>app</sup> ] <sup>+</sup>       |
| 363.0082 | 3.61 | Myricetin: [M+Na+Na-H] <sup>+</sup>                    |
| 339.0115 | 3.60 | Myricetin: [M+Na-2H <sup>app</sup> ] <sup>+</sup>      |
| 321.0495 | 3.61 | Myricetin: unknown feature                             |

---

|          |      |                                                                                               |
|----------|------|-----------------------------------------------------------------------------------------------|
| 430.9929 | 3.60 | Myricetin: unknown feature                                                                    |
| 439.0461 | 3.60 | Myricetin: unknown feature                                                                    |
| 440.0469 | 3.61 | Myricetin: unknown feature                                                                    |
| 454.0093 | 3.61 | Myricetin: unknown feature                                                                    |
| 455.016  | 3.60 | Myricetin: unknown feature                                                                    |
| 457.0194 | 3.61 | Myricetin: unknown feature                                                                    |
| 457.0565 | 3.60 | Myricetin: unknown feature                                                                    |
| 466.0037 | 3.61 | Myricetin: unknown feature                                                                    |
| 492.9685 | 3.61 | Myricetin: unknown feature                                                                    |
| 303.0497 | 4.19 | Quercetin: [M+H] <sup>+</sup>                                                                 |
| 347.0149 | 4.19 | Quercetin: [M+H+2Na-2H] <sup>+</sup>                                                          |
| 382.022  | 4.19 | Quercetin: unknown feature                                                                    |
| 397.9937 | 4.19 | Quercetin: unknown feature                                                                    |
| 408.9835 | 4.19 | Quercetin: unknown feature                                                                    |
| 414.9987 | 4.19 | Quercetin: unknown feature                                                                    |
| 423.0514 | 4.19 | Quercetin: unknown feature                                                                    |
| 424.0518 | 4.19 | Quercetin: unknown feature                                                                    |
| 424.9556 | 4.19 | Quercetin: unknown feature                                                                    |
| 428.0295 | 4.19 | Quercetin: unknown feature                                                                    |
| 438.0134 | 4.19 | Quercetin: unknown feature                                                                    |
| 439.0202 | 4.19 | Quercetin: unknown feature                                                                    |
| 441.0243 | 4.19 | Quercetin: unknown feature                                                                    |
| 442.994  | 4.19 | Quercetin: unknown feature                                                                    |
| 450.0087 | 4.19 | Quercetin: unknown feature                                                                    |
| 451.0151 | 4.19 | Quercetin: unknown feature                                                                    |
| 464.0772 | 4.19 | Quercetin: unknown feature                                                                    |
| 476.9734 | 4.19 | Quercetin: unknown feature                                                                    |
| 611.1595 | 2.92 | Rutin: [M+H] <sup>+</sup>                                                                     |
| 303.0497 | 2.93 | Rutin: [M+H-(C <sub>12</sub> H <sub>22</sub> O <sub>10</sub> -H <sub>2</sub> O)] <sup>+</sup> |
| 465.1029 | 2.92 | Rutin: [M+H-(C <sub>6</sub> H <sub>12</sub> O <sub>5</sub> -H <sub>2</sub> O)] <sup>+</sup>   |
| 633.142  | 2.92 | Rutin: [M+Na] <sup>+</sup>                                                                    |
| 655.1217 | 2.92 | Rutin: [M+Na+Na-H] <sup>+</sup>                                                               |
| 301.0339 | 2.93 | Rutin: unknown feature                                                                        |
| 626.1744 | 2.93 | Rutin: unknown feature                                                                        |
| 631.1291 | 2.93 | Rutin: unknown feature                                                                        |
| 665.0769 | 2.93 | Rutin: unknown feature                                                                        |
| 695.116  | 2.93 | Rutin: unknown feature                                                                        |
| 701.1252 | 2.92 | Rutin: unknown feature                                                                        |
| 705.0952 | 2.92 | Rutin: unknown feature                                                                        |
| 717.0972 | 2.92 | Rutin: unknown feature                                                                        |
| 723.108  | 2.92 | Rutin: unknown feature                                                                        |
| 393.1709 | 0.59 | Theanine: [2M+Na+Na-H] <sup>+</sup>                                                           |
| 175.1079 | 0.59 | Theanine: [M+H] <sup>+</sup>                                                                  |
| 197.0894 | 0.59 | Theanine: [M+Na] <sup>+</sup>                                                                 |

---

---

|          |      |                                                |
|----------|------|------------------------------------------------|
| 219.0717 | 0.59 | Theanine: [M+Na+Na-H] <sup>+</sup>             |
| 179.0792 | 0.59 | Theanine: [M+Na-H <sub>2</sub> O] <sup>+</sup> |
| 168.1033 | 0.59 | Theanine: unknown feature                      |
| 176.1044 | 0.59 | Theanine: unknown feature                      |
| 177.1124 | 0.59 | Theanine: unknown feature                      |
| 189.1234 | 0.59 | Theanine: unknown feature                      |
| 208.1326 | 0.59 | Theanine: unknown feature                      |
| 231.0649 | 0.59 | Theanine: unknown feature                      |
| 254.081  | 0.59 | Theanine: unknown feature                      |
| 259.0598 | 0.59 | Theanine: unknown feature                      |
| 270.0526 | 0.60 | Theanine: unknown feature                      |
| 274.0244 | 0.59 | Theanine: unknown feature                      |
| 275.0318 | 0.59 | Theanine: unknown feature                      |
| 277.0324 | 0.59 | Theanine: unknown feature                      |
| 281.0415 | 0.59 | Theanine: unknown feature                      |
| 287.059  | 0.59 | Theanine: unknown feature                      |
| 342.0115 | 0.59 | Theanine: unknown feature                      |
| 409.1367 | 0.59 | Theanine: unknown feature                      |

---

**Figure S2.** Number of occurrences of adducts/fragments in the annotated features in the analyses of the mixture of reference compounds by laboratory A and laboratory B

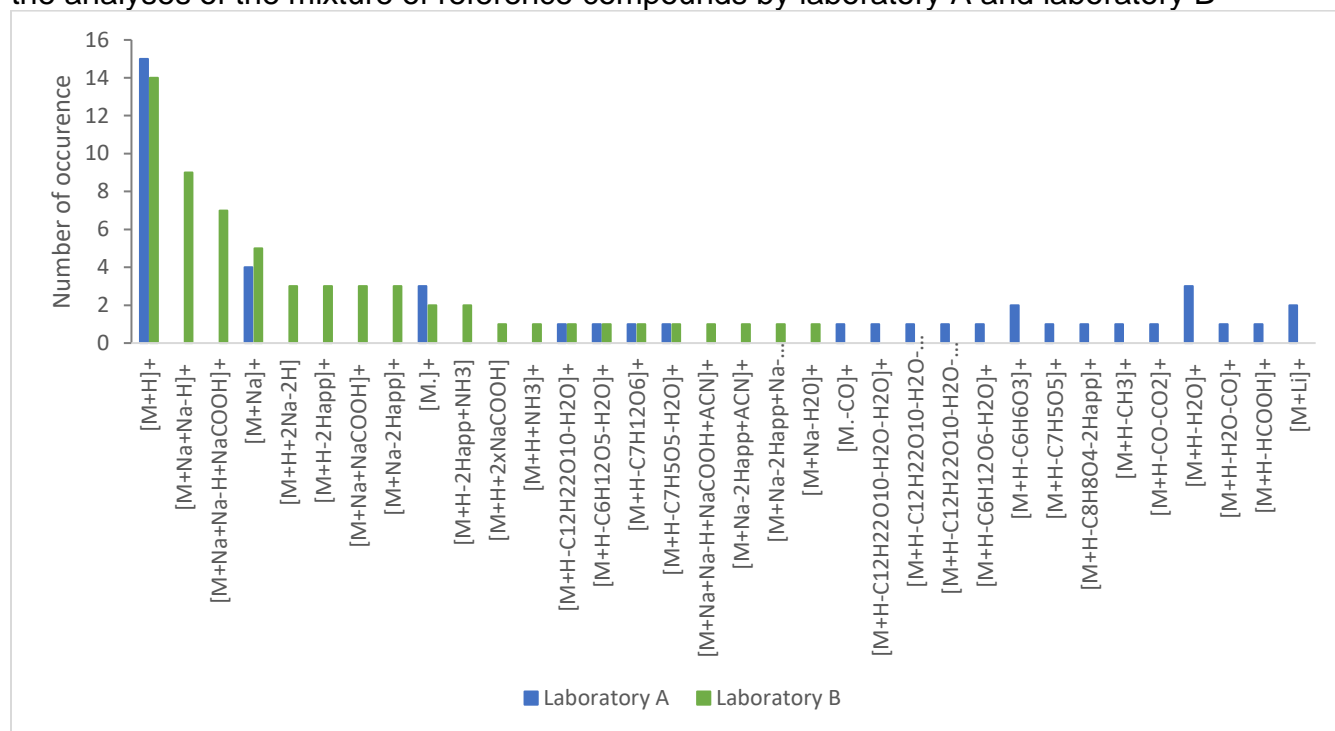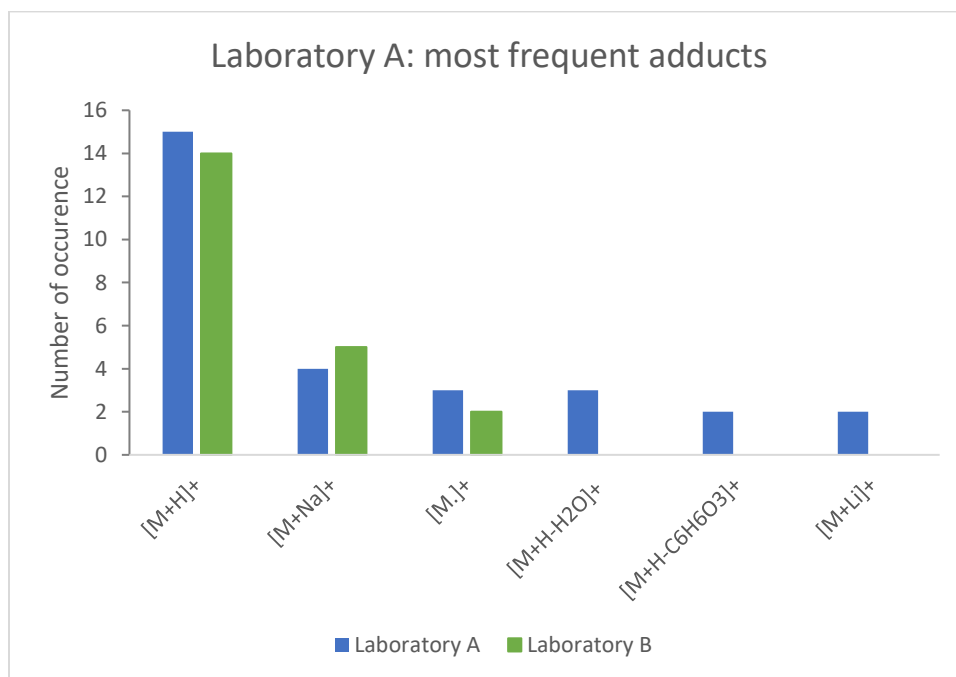

Laboratory B: most frequent adducts

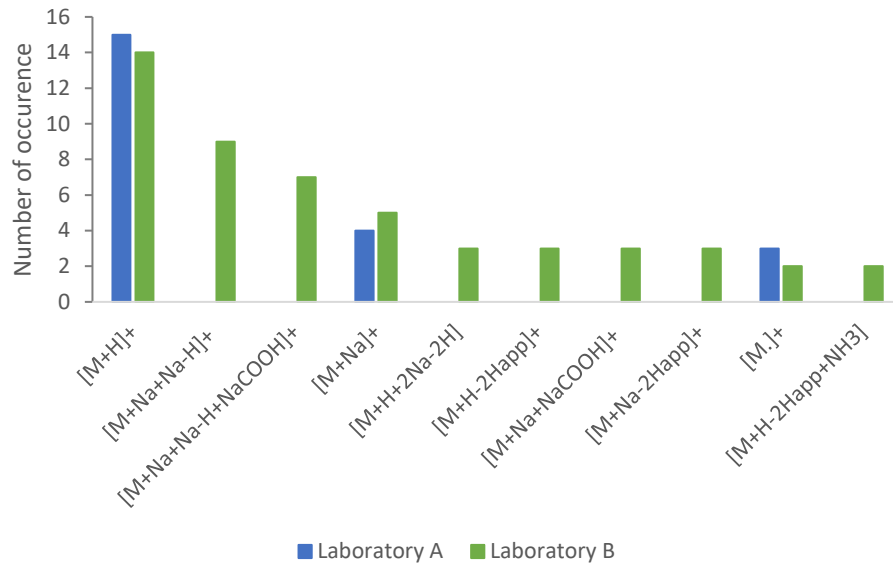

**Table S5a:** Reference list of charged adducts used for annotation

| Charge carrier  | Neutral mass                        | Formal annotation                                      | Mass difference related to [M+H] <sup>+</sup> | Comment                | References                |
|-----------------|-------------------------------------|--------------------------------------------------------|-----------------------------------------------|------------------------|---------------------------|
| H <sup>+</sup>  | NH <sub>3</sub> -H <sub>2</sub> O   | [M+H+NH <sub>3</sub> -H <sub>2</sub> O] <sup>+</sup>   | -0.98456                                      |                        | 4                         |
| Li <sup>+</sup> |                                     | [M+Li] <sup>+</sup>                                    | 6.00763                                       |                        | 4                         |
| H <sup>+</sup>  | NH <sub>3</sub>                     | [M+H+NH <sub>3</sub> ] <sup>+</sup>                    | 17.02600                                      |                        | 5                         |
| H <sup>+</sup>  | H <sub>2</sub> O                    | [M+H+H <sub>2</sub> O] <sup>+</sup>                    | 18.01002                                      |                        | 4                         |
| Na <sup>+</sup> |                                     | [M+Na] <sup>+</sup>                                    | 21.98140                                      |                        | 5                         |
| H <sup>+</sup>  | CH <sub>3</sub> OH                  | [M+H+CH <sub>3</sub> OH] <sup>+</sup>                  | 32.02567                                      | methanol               | 5                         |
| Na <sup>+</sup> | NH <sub>3</sub>                     | [M+Na+NH <sub>3</sub> ] <sup>+</sup>                   | 39.00795                                      |                        | 6                         |
| Na <sup>+</sup> | H <sub>2</sub> O                    | [M+Na+H <sub>2</sub> O] <sup>+</sup>                   | 39.99196                                      |                        | 5                         |
| H <sup>+</sup>  | CH <sub>3</sub> CN                  | [M+H+CH <sub>3</sub> CN] <sup>+</sup>                  | 41.02600                                      | acetonitrile           | 5                         |
| Na <sup>+</sup> | Na-H                                | [M+Na+Na-H] <sup>+</sup>                               | 43.96334                                      |                        | 5                         |
| H <sup>+</sup>  | HCOOH                               | [M+H+HCOOH] <sup>+</sup>                               | 46.00493                                      |                        | 7                         |
| K <sup>+</sup>  | NH <sub>3</sub>                     | [M+K+NH <sub>3</sub> ] <sup>+</sup>                    | 54.98188                                      |                        | 6                         |
| H <sup>+</sup>  | NaCl                                | [M+H+NaCl] <sup>+</sup>                                | 57.95807                                      |                        | 6                         |
| Na <sup>+</sup> | K-H                                 | [M+Na+K-H] <sup>+</sup>                                | 59.93728                                      |                        | 6                         |
| H <sup>+</sup>  | C <sub>3</sub> H <sub>8</sub> O     | [M+H+C <sub>3</sub> H <sub>8</sub> O] <sup>+</sup>     | 60.05697                                      | isopropanol            | 5                         |
| Na <sup>+</sup> | CH <sub>3</sub> CN                  | [M+Na+CH <sub>3</sub> CN] <sup>+</sup>                 | 63.00795                                      | acetonitrile           | 5                         |
| H <sup>+</sup>  | NH <sub>3</sub> +HCOOH              | [M+H+NH <sub>3</sub> +HCOOH] <sup>+</sup>              | 63.03148                                      |                        | 7                         |
| Na <sup>+</sup> | 2Na-2H                              | [M+Na+2Na-2H] <sup>+</sup>                             | 65.94529                                      |                        | 5                         |
| Na <sup>+</sup> | HCOOH                               | [M+Na+HCOOH] <sup>+</sup>                              | 67.98688                                      |                        | 7                         |
| K <sup>+</sup>  | K-H                                 | [M+K+K-H] <sup>+</sup>                                 | 75.91122                                      |                        | 5                         |
| K <sup>+</sup>  |                                     | [M+K] <sup>+</sup>                                     | 37.95533                                      |                        | 5                         |
| H <sup>+</sup>  | C <sub>2</sub> H <sub>6</sub> OS    | [M+H+C <sub>2</sub> H <sub>6</sub> OS] <sup>+</sup>    | 78.01339                                      | DMSO                   | 5                         |
| K <sup>+</sup>  | CH <sub>3</sub> CN                  | [M+K+CH <sub>3</sub> CN] <sup>+</sup>                  | 78.98188                                      | acetonitrile           | 6                         |
| Na <sup>+</sup> | NaCl                                | [M+Na+NaCl] <sup>+</sup>                               | 79.94002                                      |                        | 6                         |
| H <sup>+</sup>  | 2xCH <sub>3</sub> CN                | [M+H+2xCH <sub>3</sub> CN] <sup>+</sup>                | 82.05255                                      | acetonitrile           | 5                         |
| H <sup>+</sup>  | C <sub>3</sub> H <sub>8</sub> O+Na  | [M+H+C <sub>3</sub> H <sub>8</sub> O+Na] <sup>+</sup>  | 83.04674                                      | isopropanol            | 5                         |
| K <sup>+</sup>  | HCOOH                               | [M+K+HCOOH] <sup>+</sup>                               | 83.96081                                      |                        | 7                         |
| Na <sup>+</sup> | NaCOOH                              | [M+Na+NaCOOH] <sup>+</sup>                             | 89.96882                                      |                        | 6                         |
| K <sup>+</sup>  | NaCl                                | [M+K+NaCl] <sup>+</sup>                                | 95.91396                                      |                        | 6                         |
| K <sup>+</sup>  | NaCOOH                              | [M+K+NaCOOH] <sup>+</sup>                              | 105.94276                                     |                        | 6                         |
| Na <sup>+</sup> | Na-H+NaCOOH                         | [M+Na+Na-H+NaCOOH] <sup>+</sup>                        | 111.95077                                     |                        | Observed in Lab A dataset |
| H <sup>+</sup>  | Na-H+NaCOOH                         | [M+H+Na-H+NaCOOH] <sup>+</sup>                         | 89.96882                                      |                        | Observed in Lab A dataset |
| H <sup>+</sup>  | CH <sub>3</sub> OH-H <sub>2</sub> O | [M+H+CH <sub>3</sub> OH-H <sub>2</sub> O] <sup>+</sup> | 14.01510                                      |                        | 4                         |
| H <sup>+</sup>  | H <sub>2</sub> <sup>app</sup>       | [M+H+H <sub>2</sub> <sup>app</sup> ] <sup>+</sup>      | -2.01620                                      | oxidation-like process | 4                         |

**Table S5b:** Reference list of neutral losses used for annotation

| Neutral losses                                                      |                 |                                                                  |           |
|---------------------------------------------------------------------|-----------------|------------------------------------------------------------------|-----------|
| Description                                                         | Mass difference | Comments                                                         | Reference |
| (C <sub>6</sub> H <sub>12</sub> O <sub>5</sub> -H <sub>2</sub> O)   | -146.05791      | desoxy-hexose-H <sub>2</sub> O / methyl-pentose-H <sub>2</sub> O | 8         |
| (C <sub>12</sub> H <sub>22</sub> O <sub>10</sub> -H <sub>2</sub> O) | -308.11074      | rutinose-H <sub>2</sub> O                                        | 8         |
| 2xH <sub>2</sub> O                                                  | -36.02113       |                                                                  | 9         |
| C <sub>2</sub> H <sub>6</sub> O                                     | -46.04187       |                                                                  | 9         |
| 3xH <sub>2</sub> O                                                  | -54.03170       |                                                                  | 9         |
| CH <sub>3</sub> -COOH                                               | -60.02113       |                                                                  | 9         |
| CO-CO <sub>2</sub>                                                  | -74.00040       |                                                                  | 9         |
| CH <sub>3</sub> -CH <sub>2</sub> -COOH-NH                           | -89.04768       |                                                                  | 9         |
| 2xCO <sub>2</sub> -H <sub>2</sub> O                                 | -105.99023      |                                                                  | 9         |
| 2CO <sub>2</sub> +2H <sub>2</sub> O                                 | -124.00079      |                                                                  | 9         |
| C <sub>6</sub> H <sub>8</sub> O <sub>6</sub>                        | -176.03209      | glucuronic acid                                                  | 4         |
| NH <sub>3</sub>                                                     | -17.02655       | amine containing molecule                                        | 4         |
| H <sub>2</sub> O                                                    | -18.01057       |                                                                  | 4         |
| H <sub>2</sub> O-NH <sub>3</sub>                                    | -35.03711       |                                                                  | 4         |
| C <sub>2</sub> H <sub>2</sub> O                                     | -42.01057       | deacetylation                                                    | 4         |
| 2Na-2H                                                              | -43.96389       |                                                                  | 4         |
| C <sub>9</sub> H <sub>8</sub> O <sub>3</sub> -H <sub>2</sub> O      | -146.03678      | coumaroyl                                                        | 4         |
| (C <sub>6</sub> H <sub>12</sub> O <sub>6</sub> -H <sub>2</sub> O)   | -162.05283      | hexose-H <sub>2</sub> O                                          | 4         |
| C <sub>6</sub> H <sub>6</sub> O <sub>3</sub>                        | -126.03170      | Hetero Cyclic Ring Fragmentation                                 | 10        |
| C <sub>8</sub> H <sub>8</sub> O <sub>2</sub>                        | -136.05243      | Retro Diels Alder (ring B: 1xOH)                                 | 10        |
| C <sub>8</sub> H <sub>8</sub> O <sub>3</sub>                        | -152.04735      | Retro Diels Alder (ring B: 2xOH)                                 | 10        |
| C <sub>8</sub> H <sub>8</sub> O <sub>4</sub>                        | -168.04226      | Retro Diels Alder (ring B: 3xOH)                                 | 10        |
| C <sub>6</sub> H <sub>6</sub> O <sub>3</sub> -H <sub>2</sub> O      | -144.04226      | Hetero Cyclic Ring Fragmentation-H <sub>2</sub> O                | 10        |
| CH <sub>3</sub> •                                                   | -15.02348       | demethylation                                                    | 11        |
| O                                                                   | -15.99492       |                                                                  | 11        |
| CHN                                                                 | -27.01090       |                                                                  | 11        |
| CO                                                                  | -27.99492       |                                                                  | 11        |
| CH <sub>3</sub> OH                                                  | -32.02622       | methanol                                                         | 11        |
| CO <sub>2</sub>                                                     | -43.98983       |                                                                  | 11        |
| COOH                                                                | -44.99766       |                                                                  | 11        |
| HCOOH                                                               | -46.00548       |                                                                  | 11        |
| 2xCO                                                                | -55.98983       |                                                                  | 11        |
| (C <sub>7</sub> H <sub>6</sub> O <sub>5</sub> -H <sub>2</sub> O)    | -152.01096      | galloyl                                                          | 12        |
| NaCOOH                                                              | -67.98743       |                                                                  | 6         |
| C <sub>7</sub> H <sub>12</sub> O <sub>6</sub>                       | -192.06339      | quinic acid                                                      | 13        |

**Table S5c:** Reference list of neutral additions used for annotation

| Neutral additions                  |                 |                        |           |
|------------------------------------|-----------------|------------------------|-----------|
| Description                        | Mass difference | Comments               | Reference |
| NaCl                               | 57.95862        |                        | 9         |
| Na+C <sub>3</sub> H <sub>8</sub> O | 83.04729        | sodium and isopropanol | 5         |
| KCOOH                              | 83.96136        |                        | 9         |
| NaCOOH+Na-H                        | 89.96937        |                        | 9         |
| 2xNaCl                             | 115.91725       |                        | 9         |
| 2xNaCOOH                           | 135.97485       |                        | 9         |
| Na-H                               | 21.98195        |                        | 9         |
| K-H                                | 37.95588        |                        | 9         |
| C <sub>2</sub> H <sub>3</sub> N    | 41.02655        | acetonitrile           | 9         |
| 3Na-3H                             | 65.94584        |                        | 9         |
| HCOOH+NaCOOH                       | 113.99291       |                        | 9         |
| NaCl+NaCOOH                        | 125.94605       |                        | 9         |
| CH <sub>3</sub> OH                 | 32.02622        | methanol               | 4         |
| HCOOH                              | 46.00548        |                        | 4         |
| C <sub>3</sub> H <sub>8</sub> O    | 60.05752        | isopropanol            | 5         |



**A**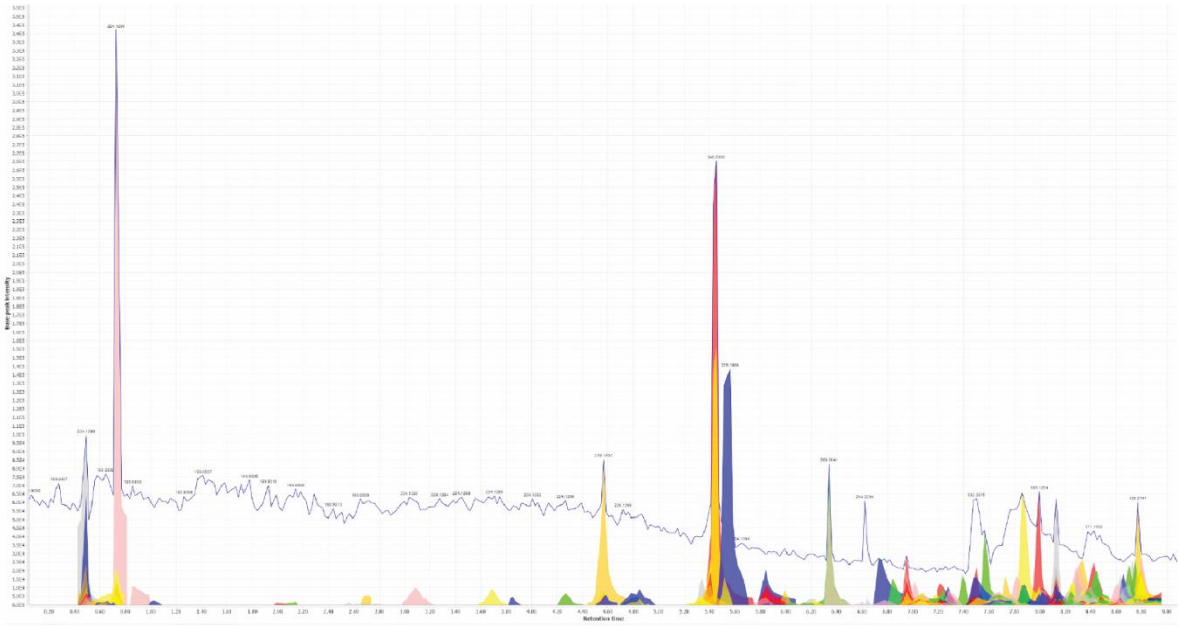**B**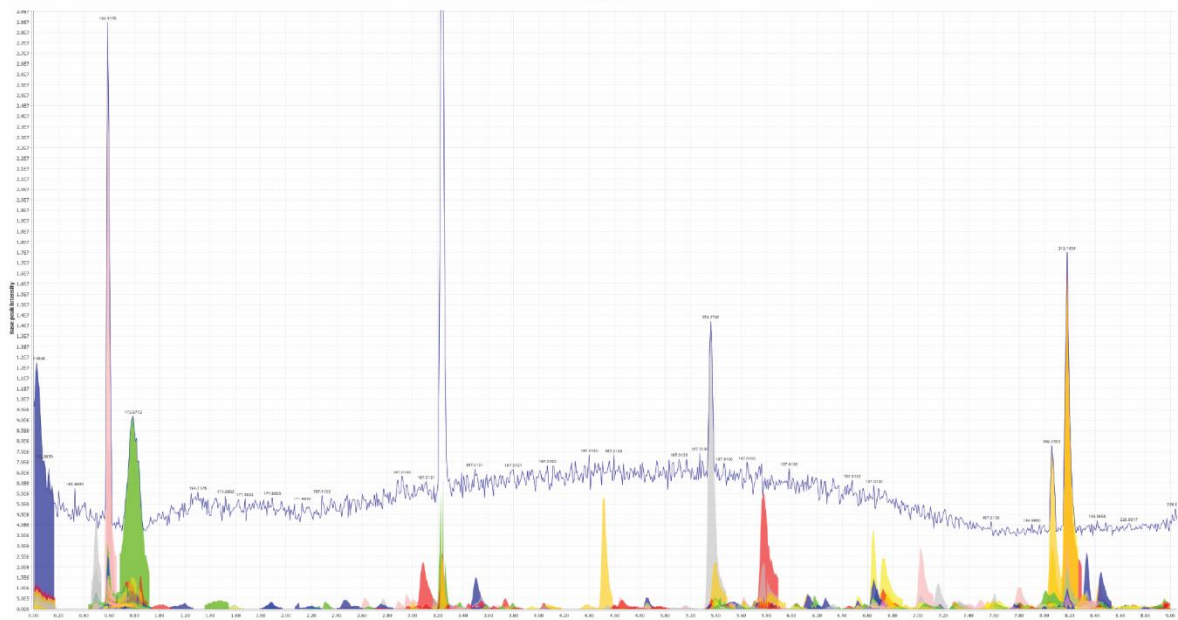

**Figure S3.** Blank traces for Laboratory A (**A**) and Laboratory B (**B**) showing TIC (above in blue line) and retained features after MZmine 2.0 processing (below).

## Laboratory A

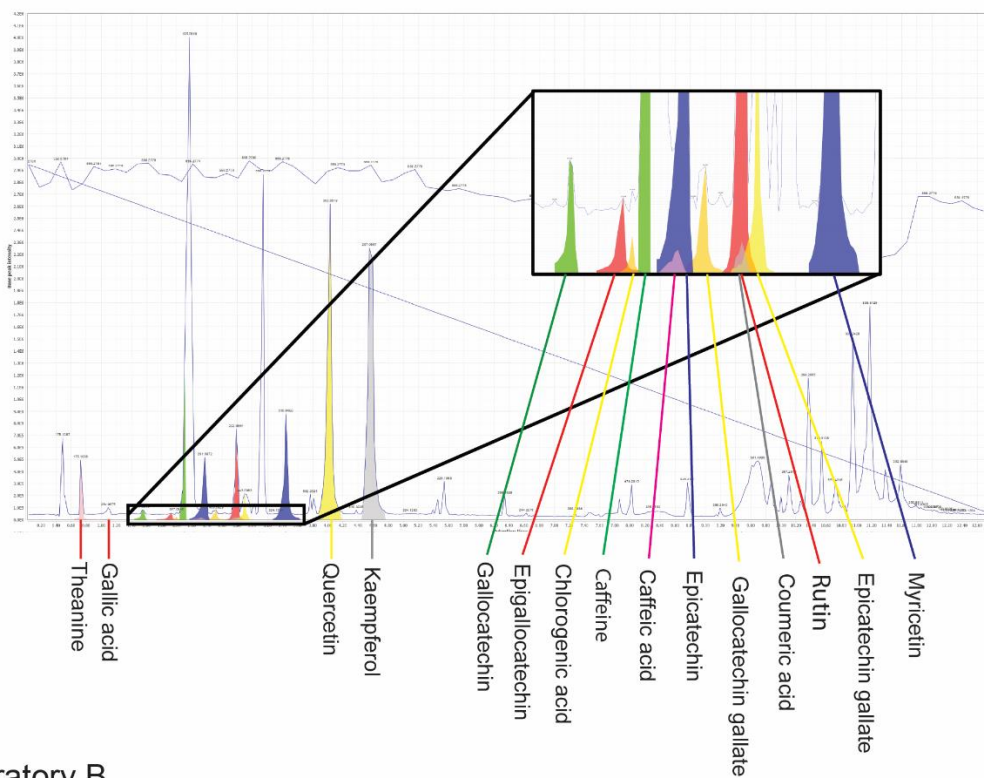

## Laboratory B

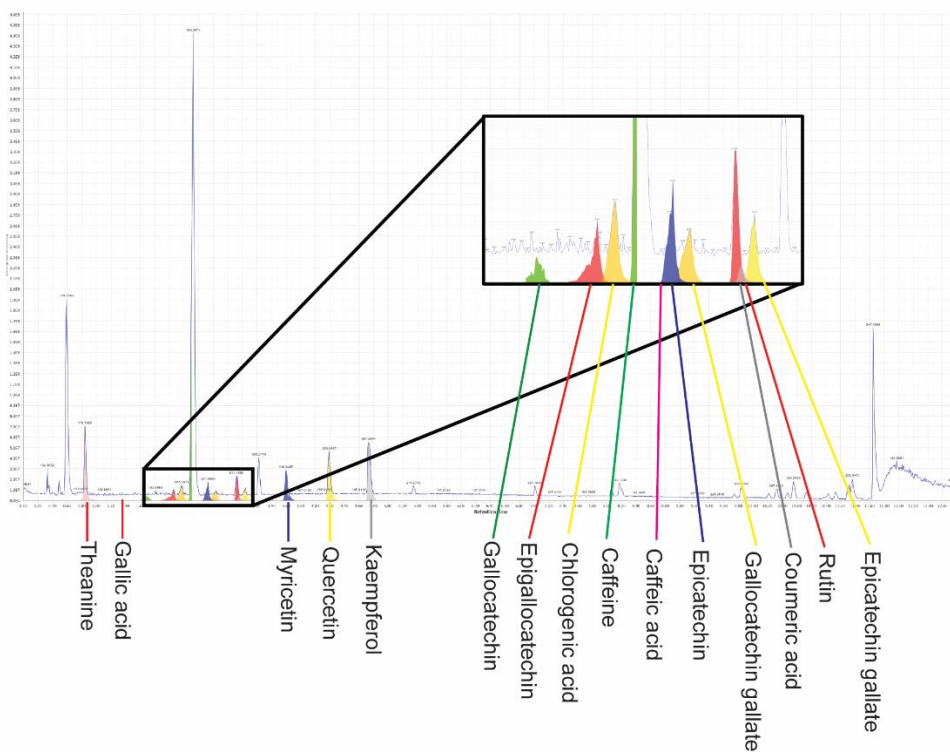

**Figure S4.** Standard mix injection traces for Laboratory A and Laboratory B after MZmine 2.0 processing and filtered for only the standards.

**Table S6.** Comparison of limits of detection for three representative green tea constituents between Laboratory A and Laboratory B.

| Compound             | Laboratory A <sup>a</sup> |                          | Laboratory B <sup>b</sup> |             |
|----------------------|---------------------------|--------------------------|---------------------------|-------------|
|                      | LOD (µg/mL) <sup>c</sup>  | LOQ (µg/mL) <sup>d</sup> | LOD (µg/mL)               | LOQ (µg/mL) |
| (-)-epigallocatechin | 0.57                      | 1.9                      | 0.078                     | 0.26        |
| rutin                | 0.091                     | 0.30                     | 0.044                     | 0.15        |
| kaempferol           | 0.25                      | 0.84                     | 0.061                     | 0.20        |

- Data for laboratory A were collected on a Waters SYNAPT G2-Si qTOF mass spectrometer.
- Data for laboratory B were collected with a Thermo Fisher Q-Exactive Plus Orbitrap.
- Limit of detection (LOD) was calculated from analyzing standards in triplicate at a range of concentrations between 0.2 and 100 µg/mL on each instrument. Only the linear portion of the calibration curve was used for the LOD determination. LOD was calculated by the equation  $LOD = \frac{3s}{m}$ , where  $m$  is the slope of the calibration curve and  $s$  = the standard deviation in peak area of three replicate injections of the standard at the lowest concentration within the linear range of the calibration curve.
- Limit of Quantitation (LOQ) was calculated by the equation  $LOQ = \frac{10s}{m}$ .

## References

- (1) Amazon.com, AmazonBest Sellers <http://www.amazon.com/ Best-Sellers-Grocery-Gourmet-Food-Green-Tea-Beverages/zgbs/ grocery/16318471> (accessed Nov 11, 2015).
- (2) Anonymous. *Consum. Rep*; 2003.
- (3) Health, J. Green Tea Supplement Reviews.
- (4) Damont, A.; Olivier, M.-F.; Warnet, A.; Lyan, B.; Pujos-Guillot, E.; Jamin, E. L.; Debrauwer, L.; Bernillon, S.; Junot, C.; Tabet, J.-C.; Fenaille, F. Proposal for a Chemically Consistent Way to Annotate Ions Arising from the Analysis of Reference Compounds under ESI Conditions: A Prerequisite to Proper Mass Spectral Database Constitution in Metabolomics. *J. Mass Spectrom.* **2019**, *54* (6), 567–582.
- (5) Feihn Lab. Mass Spectrometry Adduct Calculator 2016 <https://fiehnlab.ucdavis.edu/staff/kind/metabolomics/ms-adduct-calculator/> (accessed Jul 8, 2020).
- (6) Uppal, K.; Walker, D. I.; Jones, D. P. XMSannotator: An R Package for Network-Based Annotation of High-Resolution Metabolomics Data. *Anal. Chem.* **2017**, *89* (2), 1063–1067.
- (7) Kuhl, C.; Tautenhahn, R.; Böttcher, C.; R. Larson, T.; Neumann, S. CAMERA: An Integrated Strategy for Compound Spectra Extraction and Annotation of Liquid Chromatography/Mass Spectrometry Data Sets. *Anal. Chem.* **2011**, *84* (1), 283–289.
- (8) Abrankó, L.; García-Reyes, J. F.; Molina-Díaz, A. In-Source Fragmentation and Accurate Mass Analysis of Multiclass Flavonoid Conjugates by Electrospray Ionization Time-of-Flight Mass Spectrometry. *J. Mass Spectrom.* **2011**, *46* (5), 478–488.
- (9) Kachman, M.; Habra, H.; Duren, W.; Wigginton, J.; Sajjakulnukit, P.; Michailidis, G.; Burant, C.; Karnovsky, A. Deep Annotation of Untargeted LC-MS Metabolomics Data with Binner. *Bioinformatics* **2020**, *36* (6), 1801–1806.
- (10) Li, H.-J.; Deinzer, M. L. Tandem Mass Spectrometry for Sequencing Proanthocyanidins. *Anal. Chem.* **2007**, *79* (4), 1739–1748.
- (11) Levsen, K.; Schiebel, H.-M.; Terlouw, J. K.; Jobst, K. J.; Elend, M.; Preiß, A.; Thiele, H.; Ingendoh, A. Even-Electron Ions: A Systematic Study of the Neutral Species Lost in the Dissociation of Quasi-Molecular Ions. *J. Mass Spectrom.* **2007**, *42* (8), 1024–1044.
- (12) Wyrepkowski, C. C.; Costa, D. L. M. G. da; Sinhorin, A. P.; Vilegas, W.; De Grandis, R. A.; Resende, F. A.; Varanda, E. A.; dos Santos, L. C. Characterization and Quantification of the Compounds of the Ethanolic Extract from *Caesalpinia Ferrea* Stem Bark and Evaluation of Their Mutagenic Activity. *Molecules* **2014**, *19* (10), 16039–16057.
- (13) Xu, L.; Xu, Z.; Strashnov, I.; Liao, X. Use of Information Dependent Acquisition Mass Spectra and Sequential Window Acquisition of All Theoretical Fragment-Ion Mass Spectra for Fruit Juices Metabolomics and Authentication. *Metabolomics* **2020**, *16* (7), 81.
